# Supplementary material for: Evaluation of Mitigation Role of L-Phenylalanine-Based Low-Molecular-Weight Gelator against Oil Pollution-Induced Nile Tilapia Toxicity
Source: MDPI journal article supplement (doi:10.3390/gels9110848), 2023-10-26
Supplement: s1 [file s1]

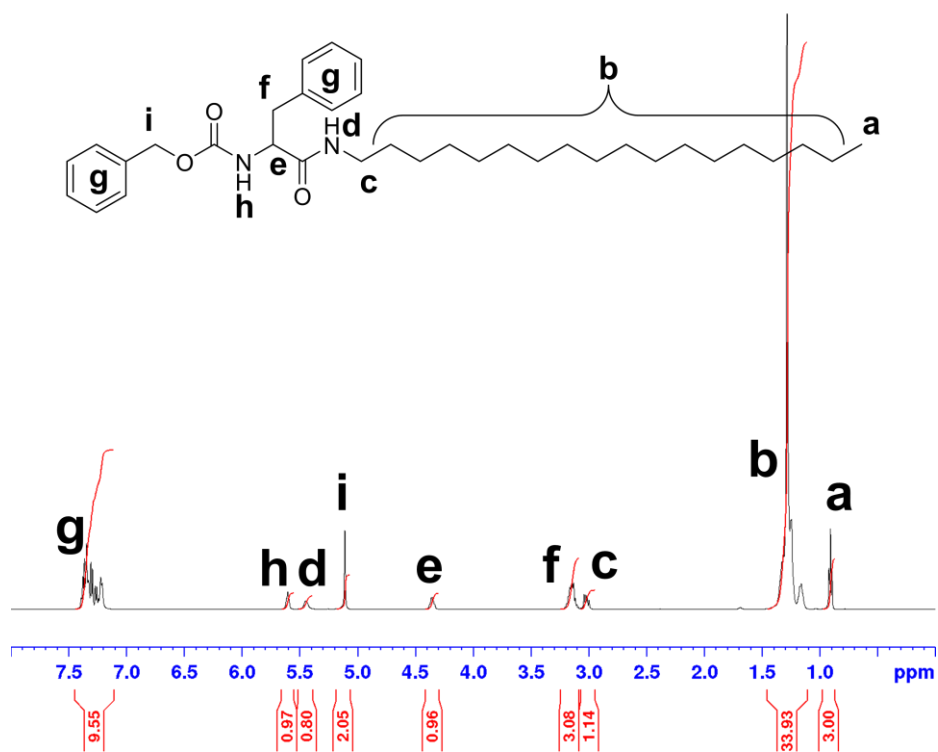

Fig. S1. <sup>1</sup>H NMR chart of Z-Phe-C<sub>18</sub> (in CDCl<sub>3</sub> at 25°C).

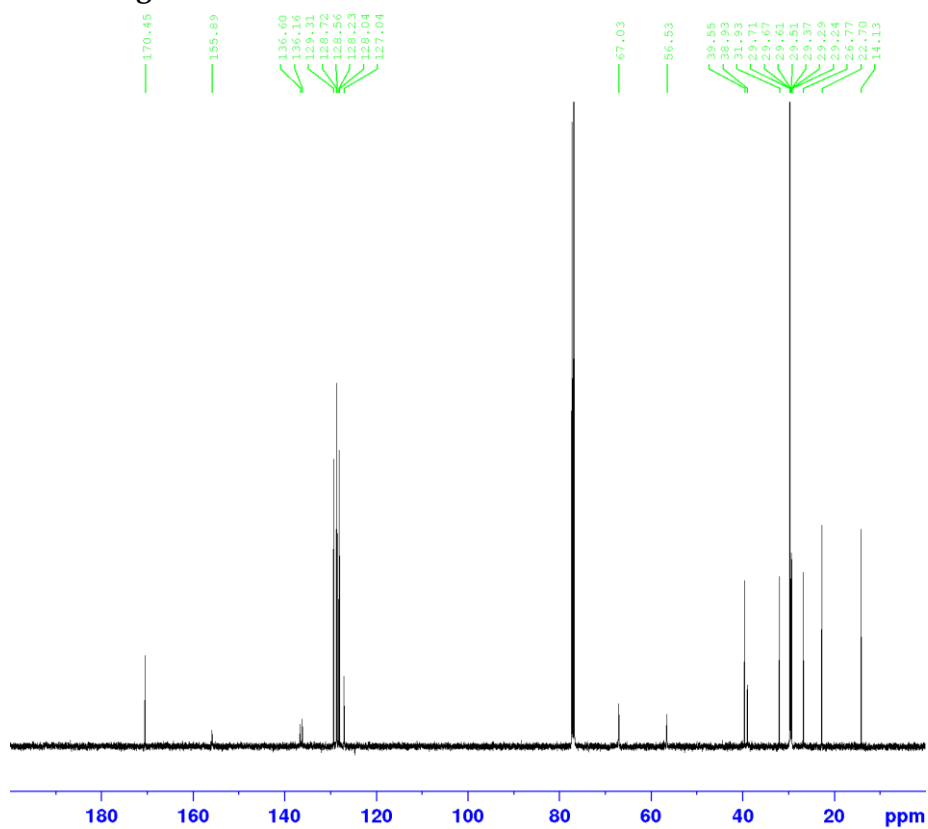

Fig. S2. <sup>13</sup>C NMR chart of Z-Phe-C<sub>18</sub> (in CDCl<sub>3</sub> at 25°C).
